# Supplementary material for: Sub-Clinical Effects of Outdoor Smoke in Affected Communities
Source: Int J Environ Res Public Health. 2021 Jan 28;18(3):1131. doi: 10.3390/ijerph18031131 (PMC7908479; doi:10.3390/ijerph18031131)
Supplement: Supplementary file 1 [file ijerph-18-01131-s001.pdf]

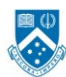

**Health effects of smoke from planned burning**

*Baseline Questionnaires*

**Region:**

**Locality:**

**Date**

☐ **MALE** ☐ **FEMALE**

**TO ANSWER THE QUESTIONS PLEASE CHOOSE THE APPROPRIATE BOX  
IF YOU ARE UNSURE OF THE ANSWER PLEASE CHOOSE 'NO'**

1. What is your date of birth?  **DAY**  **MONTH**  **YEAR**

2. For how many years you have been resident of this region?      Years      Months

3. What was your **highest** level of education (please select only one)?

☐ completed primary school education   ☐ completed secondary school education   ☐ completed trade certificate/apprenticeship   ☐ completed tertiary qualification (e.g. university degree)

4. Are you currently in paid employment? ☐ **NO**      ☐ **YES**

If **Yes**, Please specify

Full time ☐

Part time ☐

Please state your **current** occupation \_\_\_\_\_

If **No**,

I have retired ☐

Please state your occupation **before** retirement \_\_\_\_\_

5. Have you been told by a **doctor** that you have any of the following conditions?

5.1 Asthma ☐ **NO**   ☐ **YES**

If **yes**

a) How old were you when you had your first attack of asthma  **Years**  
(If started as a baby please enter 1)

b) Have you had an attack of asthma in the last 12 months ☐ **NO**   ☐ **YES**

c) Are you currently taking any medication (including inhalers, aerosols, or tablets) for asthma ☐ **NO**   ☐ **YES**

5.2 Chronic Obstructive Pulmonary Disease/airway disease-(COPD) ☐NO ☐YES

5.3 Other respiratory disease ☐NO ☐YES

5.4 Angina ☐NO ☐YES

5.5 High blood pressure/hypertension ☐NO ☐YES

5.6 High Cholesterol ☐NO ☐YES

5.7 Heart attack (this includes a myocardial infarction or coronary event) ☐NO ☐YES

5.8 Heart failure ☐NO ☐YES

5.9 Irregular heart rhythm/Arrhythmia ☐NO ☐YES

5.10 Stroke (this includes a 'mini stroke'/TIA cerebrovascular accident) ☐NO ☐YES

5.11 Other heart disease ☐NO ☐YES

6 Do you have Diabetes? ☐NO ☐YES  
If **yes**

Are you on any medications (oral tablets/ insulin injections)? ☐NO ☐YES

7 Do you have any Inflammatory Disease (e.g. Rheumatoid Arthritis, Psoriasis)? ☐NO ☐YES  
If **yes**, please describe

---

8 Any other medical condition not mentioned above. Please describe?

---

9 During the past 6 weeks have you suffered from any of the following: cold, flu, throat or chest infection?

☐NO ☐YES

If **yes** are you on any medication (e.g. antibiotics, anti-inflammatories)? ☐NO ☐YES

10. Please list all **medications** you are currently taking (started in the last six weeks)?

|  |  |
|--|--|
|  |  |
|  |  |
|  |  |
|  |  |
|  |  |

11. Please list all **medications** you are taking on a regular/on-going basis

|  |  |
|--|--|
|  |  |
|  |  |
|  |  |
|  |  |
|  |  |
|  |  |

11. Do you currently **smoke**, or have you ever smoked for as long as a year?

NEVER SMOKED ☐

YES CURRENTLY SMOKING ☐

YES, BUT STOPPED ☐

***If yes, please answer the questions below:***

How old were you when you started smoking regularly?

☐ ☐ **Years**

Have you smoked in the last month?

☐ NO ☐ YES

How old were you when you last smoked?

☐ ☐ **Years**

12. What is the main type of **home heating** you use (please tick)?

Electric ☐

Gas ☐

Hydronic ☐

Solar ☐

Wood heating - open fire place ☐

Wood heating – enclosed wood heater ☐

13 What type of **cooking burner** do you use?

Electric ☐

Gas ☐
